# Supplementary material for: Regulation of GacA in Pseudomonas chlororaphis Strains Shows a Niche Specificity
Source: PubMed Central journal article supplement (PMC4574860; doi:10.1371/journal.pone.0137553), 2015-09-17
Supplement: pone.0137553.s004.pdf [file pone.0137553.s004.pdf]

**Table S1** Strains and plasmids used in this study

| Strain or plasmid           | Description                                                                                                                                      | Reference/ source          |
|-----------------------------|--------------------------------------------------------------------------------------------------------------------------------------------------|----------------------------|
| <i>P. chlororaphis</i>      |                                                                                                                                                  |                            |
| G5                          | Phz <sup>+</sup> , Rif <sup>r</sup> , wild-type strain isolated from Chinese parsley                                                             | Li et al. 2009             |
| G5-6                        | <i>gacA</i> ::Tn5 mutant of G5, Km <sup>r</sup>                                                                                                  | This study                 |
| G5-6/ <i>gacA</i> +         | G5-6 carrying pUCP26- <i>gacA</i> for complementation, Rif <sup>r</sup> , Tc <sup>r</sup>                                                        | This study                 |
| 30-84                       | Phz+, Rif+, wild-type strain isolated from wheat                                                                                                 | Maddula et al. 2006        |
| 449                         | Phz+, Rif+, wild-type strain isolated from maize                                                                                                 | Veselova et al., 2008      |
| <i>Escherichia coli</i>     |                                                                                                                                                  |                            |
| DH5α                        | F <sup>-</sup> <i>endA1 hsdR17</i> (rk - mk <sup>+</sup> ) <i>supE44 thi-1 recA1</i><br><i>gyrA96 relA1</i> Φ80 <i>dlacZ</i> ΔM15 λ <sup>-</sup> | Green and Sambrook 2012    |
| S17-1                       | <i>thi pro hsdR hsdM recA rpsLRP4-2</i> (Tc <sup>r</sup> ::Mu) (Km <sup>r</sup> ::Tn7)                                                           | Green and Sambrook 2012    |
| <i>C. violaceum</i> CV026   | Violacein production-based acyl-HSL bioreporter, Km <sup>r</sup>                                                                                 | McClellan et al. 1997      |
| Plasmids                    |                                                                                                                                                  |                            |
| pUT mini-Tn5 Km             | MiniTn5 transposon, Km <sup>r</sup>                                                                                                              | de Lorenzo and Timmis 1994 |
| pUCP26                      | Broad host vector, Tc <sup>r</sup>                                                                                                               | West et al, 1994           |
| <i>Rhizoctonia cerealis</i> | Pathogenic fungus, causes sharp eyespot in cereal                                                                                                | Lab collection             |

## References

- de Lorenzo V and Timmis KN (1994) Analysis and construction of stable phenotypes in gram-negative bacteria with Tn5- and Tn10-derived minitransposons. *Meth Enzymol* 235: 386–405.
- Green MR, Sambrook J. *Molecular cloning : a laboratory manual*. Cold Spring Harbor, N.Y: Cold Spring Harbor Laboratory Press; 2012.
- Li H, Liu X, Gao K, Jia J. Cloning of *phzIR* from the endophytic *Pseudomonas* sp. G5 and its expression in *Escherichia coli*. *Chin J Biotech*. 2009;25:832-9.
- Maddula VSRK, Zhang Z, Pierson EA and Pierson III LS. (2006) Quorum Sensing and phenazines are involved in biofilm formation by *Pseudomonas chlororaphis* (*aureofaciens*) strain 30-84. *Microbiol Ecol*. 52:289-301.
- McClellan KH, Winson MK, Fish L, Taylor A, Chabra SR, Camara M. *et al.*, (1997) Quorum sensing in *Chromobacterium violaceum*: exploitation of violacein production and inhibition for the detection of N-acylhomoserine lactones. *Microbiol* 143:3703–3711.
- Veselova Ma, Klein Sh, Bass IA, Lipasova VA, Metlitskaia AZ, Ovadis MI *et al.*. Quorum sensing systems of regulation, synthesis of phenazine antibiotics, and antifungal activity in rhizospheric bacterium *pseudomonas chlororaphis* 449. *Russ J Genet* 2008, 44 (12):1400-1408.
- West SE, Schweizer HP, Dall C, Sample AK & Runyen-Janecky LJ (1994) Construction of improved *Escherichia*–*Pseudomonas* shuttle vectors derived from pUC18/19 and sequence of the region required for their replication in *Pseudomonas aeruginosa*. *Gene* 148: 81–86.
